# Supplementary material for: Significant promotion effect of the rutile phase on V2O5/TiO2 catalysts for NH3-SCR
Source: Royal Society of Chemistry journal article supplement (doi:10.1039/d0cc05938b), 2020-12-10
Supplement: d0cc05938b1.pdf [file d0cc05938b1.pdf]

# Significant promotion effect of rutile phase on V<sub>2</sub>O<sub>5</sub>/TiO<sub>2</sub> catalyst for NH<sub>3</sub>-SCR

Zihua Lian<sup>a</sup>, Hua Deng<sup>a</sup>, Shaohui Xin<sup>b, c</sup>, Wenpo Shan<sup>a, \*</sup>, Qiang Wang<sup>b</sup>, Jun Xu<sup>b</sup>,

Hong He<sup>a, c, d, \*</sup>

<sup>a</sup> Center for Excellence in Regional Atmospheric Environment and Key Laboratory of Urban Pollutant Conversion, Institute of Urban Environment, Chinese Academy of Sciences, Xiamen 361021, China.

<sup>b</sup> State Key Laboratory of Magnetic Resonance and Atomic and Molecular Physics, Wuhan Institute of Physics and Mathematics, Chinese Academy of Sciences, Wuhan 430071, China.

<sup>c</sup> University of Chinese Academy of Sciences, Beijing 100049, China.

<sup>d</sup> State Key Joint Laboratory of Environment Simulation and Pollution Control, Research Center for Eco-Environmental Sciences, Chinese Academy of Sciences, Beijing 100085, China

\*Correspondence: wpshan@iue.ac.cn; honghe@rcees.ac.cn.

## Experiments

### Catalyst preparation and activity tests

All chemicals used in this study were analytical reagent. TiO<sub>2</sub> support was supplied by Alfa Aesar Company, and this sample was denoted as Ti-1. Ti-1 was treated in 10% H<sub>2</sub>/N<sub>2</sub> at 700 °C for 2 h to obtain Ti-2. 1 wt.% V<sub>2</sub>O<sub>5</sub>/TiO<sub>2</sub> were prepared by impregnation method according to the previous work <sup>1</sup>, using two types of TiO<sub>2</sub> and an aqueous solution of NH<sub>4</sub>VO<sub>3</sub> (H<sub>2</sub>C<sub>2</sub>O<sub>4</sub> was added to facilitate the dissolution of NH<sub>4</sub>VO<sub>3</sub>). After impregnation, the excess water was removed using a rotary evaporator at 60 °C. The sample was first dried at 100 °C overnight and then followed by calcination at 500 °C in air for 3 h. In addition, a catalyst with 0.7% V<sub>2</sub>O<sub>5</sub> loading on Ti-2 (denoted as 0.7V/Ti-2) was prepared to ensure that the VO<sub>x</sub> surface densities on Ti-1 and Ti-2 supports are similar with each other.

The activity tests for NH<sub>3</sub>-SCR were performed in a fixed-bed quartz flow reactor with 0.3 mL of catalysts (40-60 mesh). The inlet gas included 500 ppm NO, 500 ppm NH<sub>3</sub>, 5 vol.% O<sub>2</sub> and N<sub>2</sub> balance at a total flow rate of 500 mL/min (GHSV = 100 000 h<sup>-1</sup>). Analysis of inlet and outlet gases were carried out according to our previous study<sup>2</sup>.

### Catalyst characterization

XRD, BET, NMR and H<sub>2</sub>-TPR were conducted according to our previous works <sup>2, 3</sup>. NMR spectra were collected under ambient conditions. High-resolution transmission electron microscopy (HR-TEM) images were obtained on FEI Tecnai G2 F20 with an

acceleration voltage of 200 kV. *In situ* DRIFTS experiments were performed on and FTIR spectrometer (Nicolet iS 50) equipped with a Smart Collector and an MCT/A detector cooled by liquid N<sub>2</sub>. Firstly, the sample was pretreated in a 20 vol % O<sub>2</sub>/N<sub>2</sub> flow at 300 °C for 0.5 h, and then cooled down to 175 °C. The background spectra were collected in flowing N<sub>2</sub> and automatically subtracted from the sample spectrum. The reaction conditions were controlled as follows: 500 ppm of NH<sub>3</sub>, 300 mL/min total flow rate, and N<sub>2</sub> to balance. All spectra were recorded by accumulating 100 scans with a resolution of 4 cm<sup>-1</sup>. The Raman spectra were obtained on a Jobin-Yvon Horiba Xplora confocal Raman system. The excitation wavelength was 638 nm, and the laser power was controlled at about 1.5 mW. Before the Raman experiments, the samples were pretreated under O<sub>2</sub>/Ar flow at 350 °C for 0.5 h. The XPS results of the catalysts were recorded on a scanning X-ray microprobe (Axis Ultra, Kratos Analytical Ltd.) using Al K $\alpha$  radiation (1486.7 eV). All of the binding energies were calibrated using the C 1s peak (binding energy = 284.8 eV) as standard.

#### DFT calculation

Density functional theory (DFT) calculations with periodic boundary conditions (PBC) were performed using the Perdew-Burke-Ernzerhof (PBE) functional<sup>4</sup> as implemented in the Vienna ab initio simulation package (VASP 5.4.4).<sup>5</sup> The projector augmented wave (PAW) method was used to describe the core-valence electron interaction.<sup>6</sup> All calculations were spin-polarized. The plane wave energy cutoff was set to 400 eV for all atoms. For calculating the interaction energy of monomeric, dimeric vanadia species on TiO<sub>2</sub> surfaces, a (2 × 4) supercell of the anatase (101)

surface and (3 × 2) and (6 × 2) supercell of rutile (110) surface for monomeric and dimeric species, respectively, were used as the substrates. Only the  $\Gamma$  point of the Brillouin zone was sampled. A vacuum spacing of 20 Å was used to avoid the periodic image interaction normal to the surface. The conjugate gradient algorithm was used for geometric optimization until the forces on all relaxed atoms were less than 0.02 eV Å<sup>-1</sup>. The Gaussian smearing method with a smearing width of 0.05 eV was applied to accelerate the convergence of integration at the Brillouin zone.

## Results

Table S1. N<sub>2</sub> physisorption results of vanadia-based catalysts.

| Catalysts | S <sub>BET</sub> (m <sup>2</sup> /g) | Pore volume (cc/g) | Pore diameter (nm) |
|-----------|--------------------------------------|--------------------|--------------------|
| V/Ti-1    | 39.9                                 | 0.39               | 39.5               |
| V/Ti-2    | 31.3                                 | 0.24               | 30.9               |

The average crystallite size of Anatase and Rutile particles were calculated according the XRD results and the Scherrer equation:

$$D = \frac{k \times \gamma}{\beta \times \cos\theta}$$

The results showed that the size of Anatase and Rutile particles of V/Ti-1 is 20.2 and 44.1 nm, respectively. The size of V/Ti-2 is 33.4 and 41.9 nm.

$$V = m/\rho$$

$$S = \pi D^2$$

$$V = \pi D^3/6$$

$$S_{\text{So}} = \frac{6m}{D\rho}$$

The weight ratio of rutile for V/Ti-1 and V/Ti-2 is 8% and 58%, respectively. Assuming the densities of rutile and anatase are 4.25 and 3.90 g/cm<sup>3</sup>, respectively, according to these above equations, it can be concluded that the surface area ratios of

anatase and rutile phase are 96 : 4 and 50 : 50 for V/Ti-1 and V/Ti-2, respectively.

Table S2. TOF and rate constant of vanadia-based catalysts.

| Catalysts | V <sub>2</sub> O <sub>5</sub> loading (%) | VO <sub>x</sub> surface density (VO <sub>x</sub> nm <sup>-2</sup> ) | TOF at 200 °C (s <sup>-1</sup> ) | TOF at 260 °C (s <sup>-1</sup> ) | 1 st order rate constant (mol·g <sup>-1</sup> ·h <sup>-1</sup> ) at 200 °C |
|-----------|-------------------------------------------|---------------------------------------------------------------------|----------------------------------|----------------------------------|----------------------------------------------------------------------------|
| V/Ti-1    | 1                                         | 1.66                                                                | 4.8×10 <sup>-4</sup>             | 1.3×10 <sup>-3</sup>             | 0.4                                                                        |
| V/Ti-2    | 1                                         | 2.12                                                                | 16.7×10 <sup>-4</sup>            | --                               | 4.3                                                                        |
| 0.7V/Ti-2 | 0.7                                       | 1.70                                                                | 6.6×10 <sup>-4</sup>             | 2.7×10 <sup>-3</sup>             | --                                                                         |

Table S3. XRF results of V/Ti-1 and V/Ti-2 catalysts.

| Catalysts | The mass concentration from XRF results (%) |                  |      |                                |                  |                               |      |      |                                |
|-----------|---------------------------------------------|------------------|------|--------------------------------|------------------|-------------------------------|------|------|--------------------------------|
|           | V <sub>2</sub> O <sub>5</sub>               | TiO <sub>2</sub> | MgO  | Al <sub>2</sub> O <sub>3</sub> | SiO <sub>2</sub> | P <sub>2</sub> O <sub>5</sub> | Cl   | CaO  | Fe <sub>2</sub> O <sub>3</sub> |
| V/Ti-1    | 0.85                                        | 98.01            | 0.07 | 0.29                           | 0.25             | 0.32                          | 0.04 | 0.13 | 0.04                           |
| V/Ti-2    | 0.83                                        | 98.16            | 0.05 | 0.14                           | 0.19             | 0.34                          | 0.08 | 0.14 | 0.07                           |

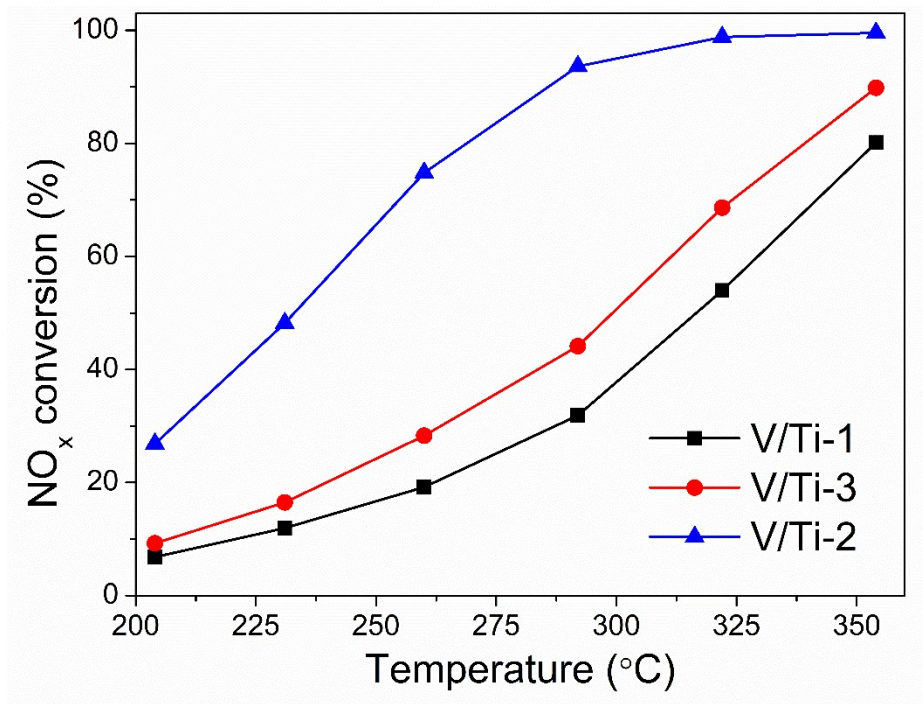

Figure S1. NH<sub>3</sub>-SCR activity of vanadia-based catalysts with different ratios of rutile phase.

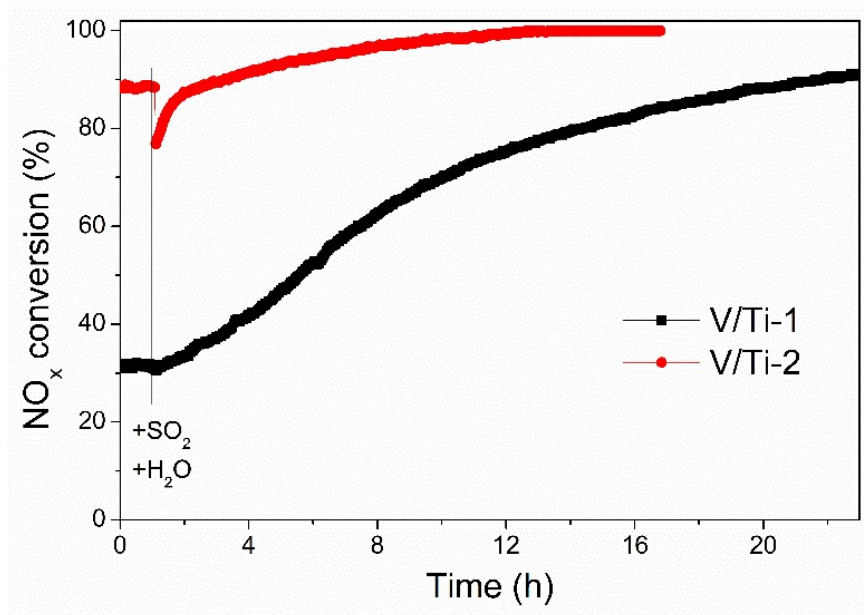

Figure S2. The effects of SO<sub>2</sub> and H<sub>2</sub>O to the catalytic activity over vanadia-based catalysts. Reaction conditions: [NO] = [NH<sub>3</sub>] = 500 ppm, [O<sub>2</sub>] = 5 vol.%, [SO<sub>2</sub>] = 100 ppm (when used), [H<sub>2</sub>O] = 5 vol.% (when used), N<sub>2</sub> balance, GHSV = 100 000 h<sup>-1</sup>, and reaction temperature = 300 °C.

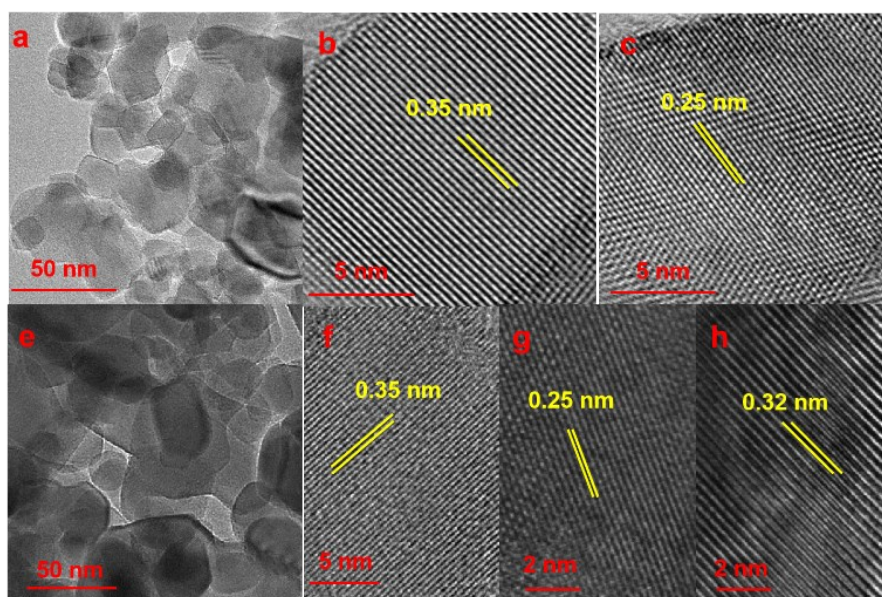

Figure S3. HR-TEM images of V/Ti-1 (a, b, c) and V/Ti-2 (e, f, g, h).

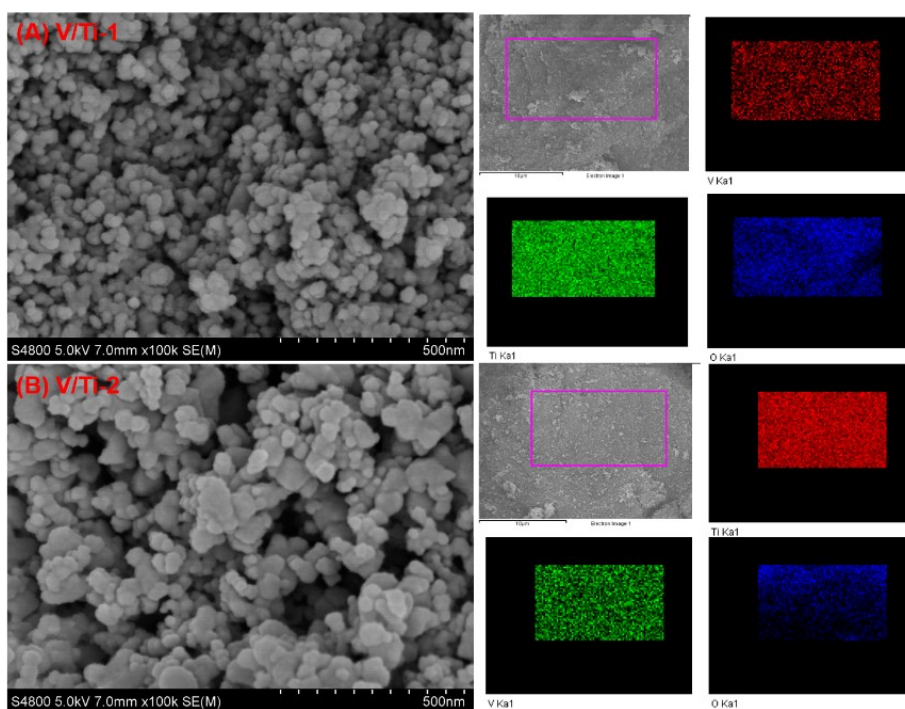

Figure S4. SEM images and elemental mapping images of V/Ti-1 and V/Ti-2.

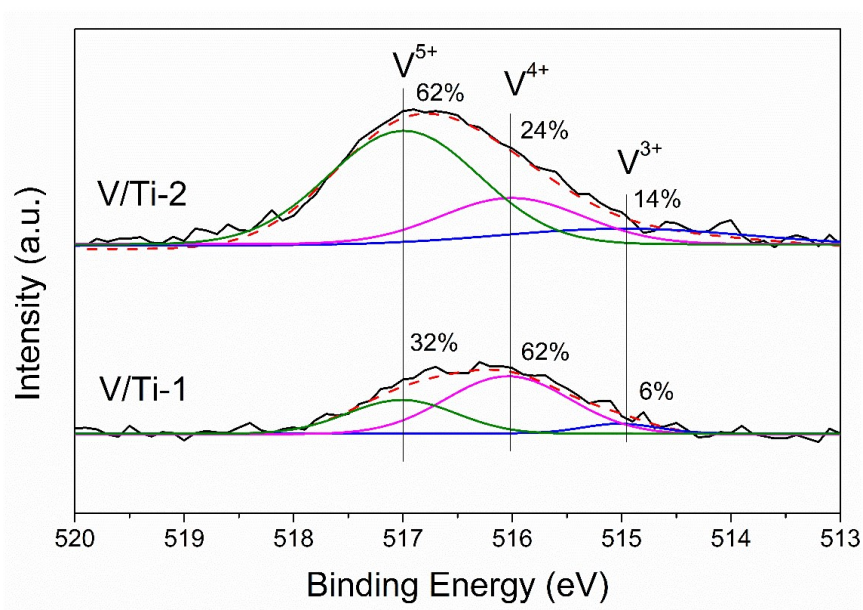

Figure S5. XPS results of V 2p on V/Ti-1 and V/Ti-2.

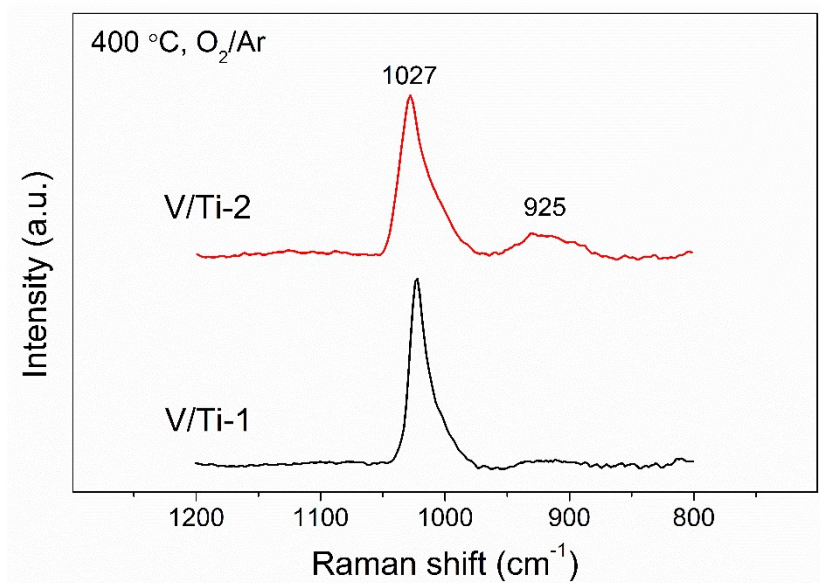

Figure S6. Raman spectra of vanadia-based catalysts.

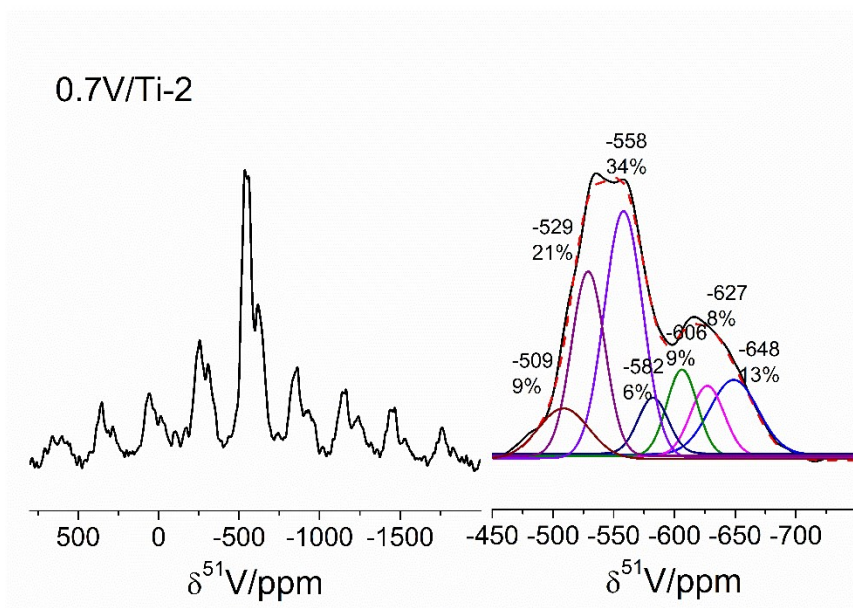

Figure S7. Solid state <sup>51</sup>V NMR spectra of 0.7V/Ti-2.



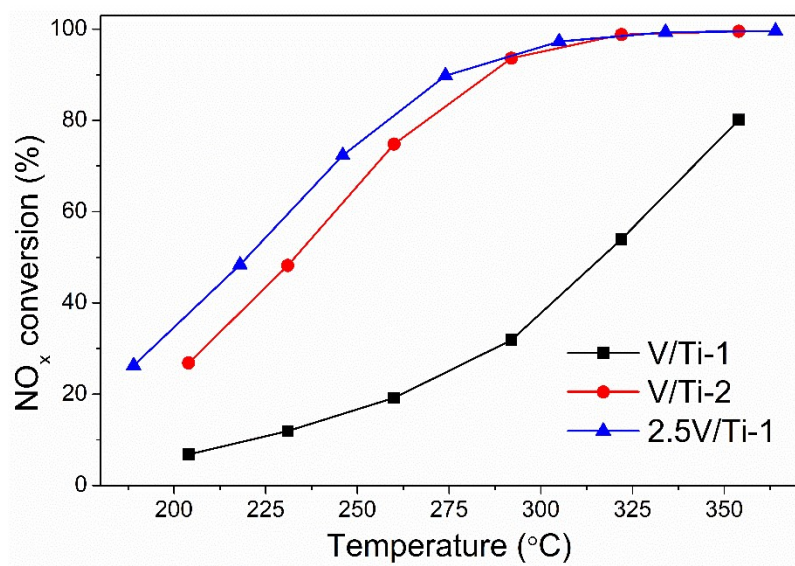

Figure S8.  $\text{NH}_3$ -SCR activities of V/Ti-1, V/Ti-2 and 2.5V/Ti-1.

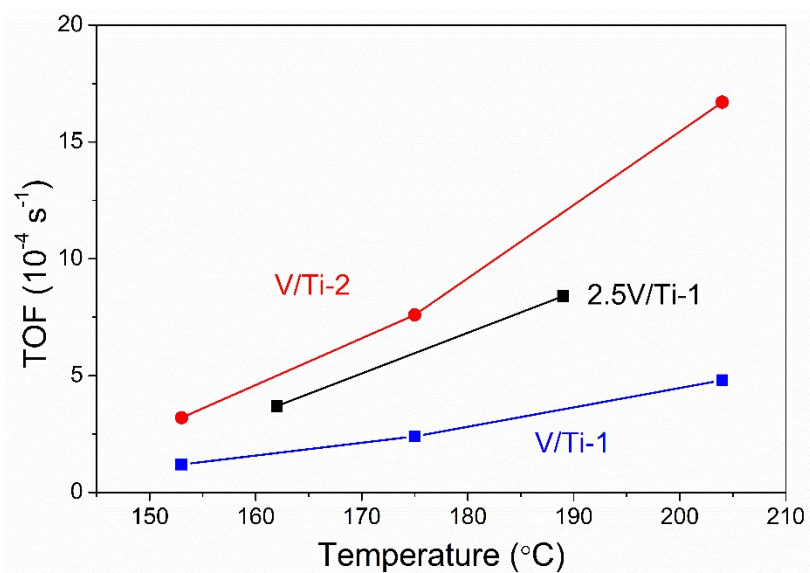

Figure S9. The TOF of V/Ti-1, V/Ti-2 and 2.5V/Ti-1.

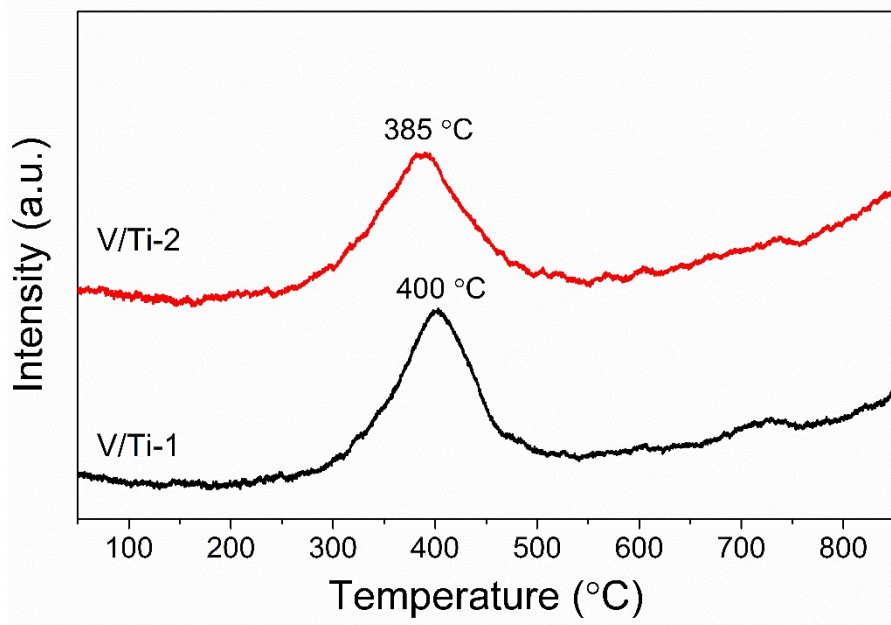

Figure S10. H<sub>2</sub>-TPR results of vanadia-based catalysts.

To investigate the redox capabilities of the vanadia-based catalysts, H<sub>2</sub>-TPR experiments were carried out, and the results are shown in Figure S10. The H<sub>2</sub> reduction peak at about 400 °C could be ascribed to the reduction of V<sup>5+</sup> to V<sup>3+</sup>.<sup>7-9</sup> Compared with V/Ti-1, V/Ti-2 showed a reduction peak shifting to the lower temperature region. It indicates that the redox capability of V/Ti-2 was higher than V/Ti-1, which could enhance the NH<sub>3</sub>-SCR performance. The H<sub>2</sub> consumption for V/Ti-1 and V/Ti-2 were similar (about 102 μmol/g) to each other.

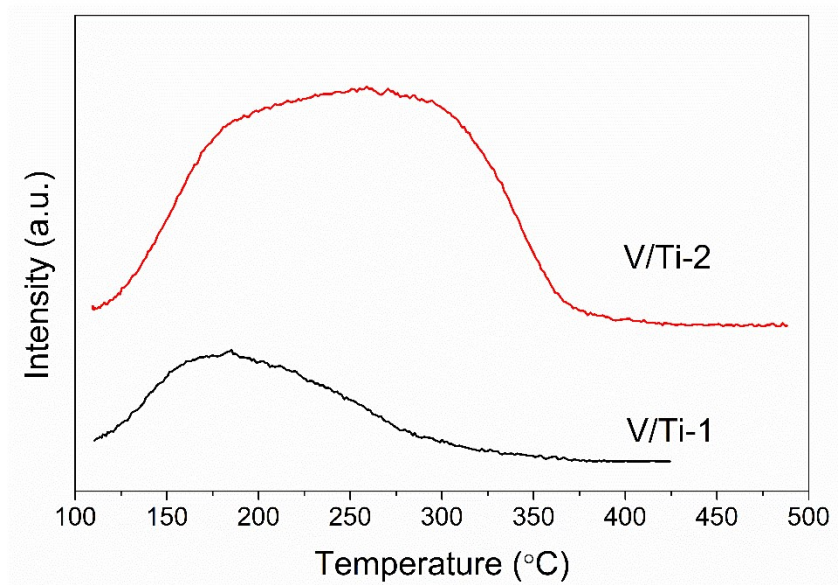

Figure S11. NH<sub>3</sub>-TPD of V/Ti-1 and V/Ti-2.

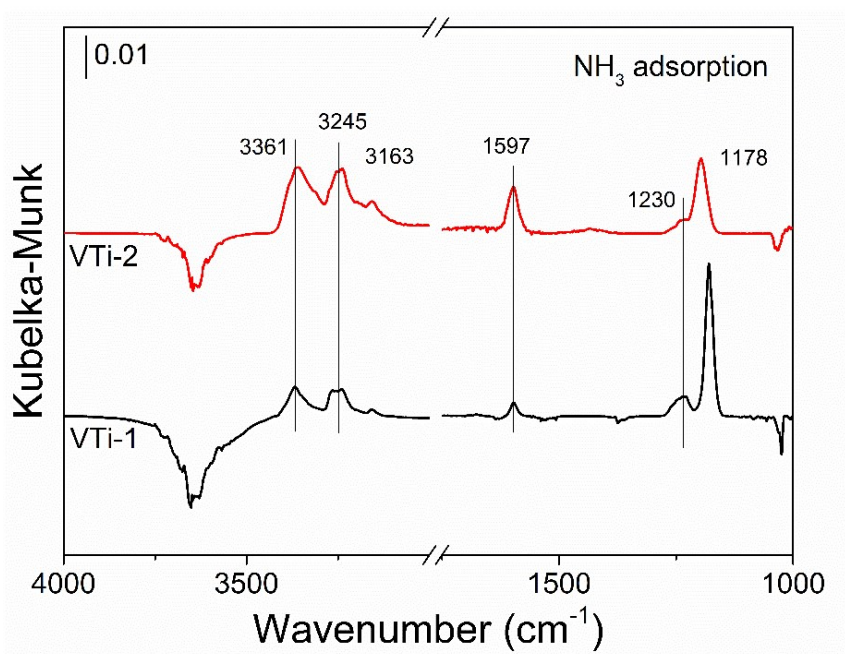

Figure S12. DRIFTS of NH<sub>3</sub> adsorption on vanadia-based catalysts.

Surface acidity is also an important property of the catalyst for NH<sub>3</sub>-SCR reaction. DRIFTS of NH<sub>3</sub> adsorption on vanadia-based catalysts at 200 °C are shown in Figure S12. After NH<sub>3</sub> was introduced, several bands due to NH<sub>3</sub> adsorption were observed. The bands at 3361, 3245, and 3163 cm<sup>-1</sup> are attributed to the stretching vibration of N-

H bonds in coordinated NH<sub>3</sub> linked to Lewis acid sites, while the bands at 1597 and 1230, 1178 cm<sup>-1</sup> are ascribed to asymmetric and symmetric bending vibrations of the coordinated NH<sub>3</sub>, respectively.<sup>10-12</sup> It is evident that more NH<sub>3</sub> adsorbed on V/Ti-2 than that on V/Ti-1. More acid sites on V/Ti-2 can facilitate the adsorption and activation of NH<sub>3</sub> during the catalytic reaction and thus promote the catalytic activity in NH<sub>3</sub>-SCR.

## References

1. Z. Lian, W. Shan, Y. Zhang, M. Wang and H. He, *Ind. Eng. Chem. Res.*, 2018, **57**, 12736-12741.
2. G. He, Z. Lian, Y. Yu, Y. Yang, K. Liu, X. Shi, Z. Yan, W. Shan and H. He, *Sci. Adv.*, 2018, **4**, eaau4637.
3. Z. Lian, W. Shan, M. Wang, H. He and Q. Feng, *J. Environ. Sci.*, 2019, **79**, 273-279.
4. J. P. Perdew, K. Burke and M. Ernzerhof, *Phys. Rev. Lett.*, 1996, **77**, 3865-3868.
5. G. Kresse and J. Furthmuller, *Phys. Rev. B*, 1996, **54**, 1758-1775.
6. G. Kresse and D. Joubert, *Phys. Rev. B*, 1999, **59**, 1758-1775.
7. W. Zhao, S. Dou, K. Zhang, L. Wu, Q. Wang, D. Shang and Q. Zhong, *Chem. Eng. J.*, 2019, **364**, 401-409.
8. I. Song, S. Youn, H. Lee, S. G. Lee, S. J. Cho and D. H. Kim, *Appl. Catal. B-environ.*, 2017, **210**, 421-431.
9. P. G. W. A. Kompio, A. Brueckner, F. Hipler, O. Manoylova, G. Auer, G. Mestl and W. Gruenert, *Appl. Catal. B-environ.*, 2017, **217**, 365-377.
10. Z. Lian, S. Xin, N. Zhu, Q. Wang, J. Xu, Y. Zhang, W. Shan and H. He, *Catal. Sci. Technol.*, 2020, **10**, 311-314.
11. A. Marberger, D. Ferri, M. Elsener and O. Kröcher, *Angew. Chem. Int. Ed.*, 2016, **55**, 11989-11994.
12. Z. Liu, S. Zhang, J. Li, J. Zhu and L. Ma, *Appl. Catal. B-environ.*, 2014, **158**, 11-19.
